# Supplementary material for: Telehealth Interventions Delivering Home-based Support Group Videoconferencing: Systematic Review
Source: PubMed Central journal article supplement (PMC5816261; doi:10.2196/jmir.8090), 2018-02-02
Supplement: jmir_v20i2e25_app1.pdf [file jmir_v20i2e25_app1.pdf]

## Multimedia Appendix 1. Quality assessment of studies reviewed

| Author<br>Year                       | Strength<br>of<br>evidence | Main features                                                                                                                                                                                                                                              |
|--------------------------------------|----------------------------|------------------------------------------------------------------------------------------------------------------------------------------------------------------------------------------------------------------------------------------------------------|
| Adamski 2009<br>[45]                 | Low                        | Mixed method comparison study, method of qualitative data gathering is unclear, analysis unclear, no detail on quantitative data for comparison or intervention group                                                                                      |
| Austrom 2015<br>[46]                 | Low                        | Mixed method prospective cohort pilot study, no control group, small numbers (n=4), no details on analysis for qualitative data, integration of data limited                                                                                               |
| Banbury 2014<br>[55]                 | High                       | Qualitative study using three evaluation methods, satisfactory numbers (n=52), method of analysis reported                                                                                                                                                 |
| Burkow 2013<br>[53]                  | High                       | Qualitative study using interviews, sample selection unclear, analysis clear, intervention well described                                                                                                                                                  |
| Burkow 2015<br>[54]                  | High                       | Mixed methods prospective cohort study, no control group, small sample size (n=10), qualitative data from interviews, findings well integrated                                                                                                             |
| Damianakis<br>2016 [49]              | High                       | Qualitative study using achieved recordings of VC meetings, content analysis and criteria well reported, three authors independently coding                                                                                                                |
| <b>Ehlers 2015</b><br><b>[47]</b>    | Low                        | Mixed methods randomised controlled study using two comparison groups, recruitment and randomisation unclear, small numbers (n=30), qualitative data from interviews, field notes and journal, three researchers independently coding, limited integration |
| Khatri 2014<br>[38]                  | High                       | Mixed methods cohort prospective pilot study, small numbers (n=18), two comparison groups, qualitative data from transcripts of group meetings, two researchers independently coding, data well integrated                                                 |
| Lundberg 2014<br>[52]                | Low                        | Qualitative case study, interviews, field notes, and website data, methods of meetings unclear, analysis unclear                                                                                                                                           |
| Marziali 2006a<br>& 2006b<br>[42,41] | Low                        | Mixed methods randomised controlled control study, randomisation unclear, outcome data for <80% of participants, qualitative data from achieved video sessions, analysis clear                                                                             |
| Marziali 2009<br>[50]                | High                       | Qualitative study, achieved VC recordings, interviews, analysis clear, small size (n=18)                                                                                                                                                                   |

| Author<br>Year                 | Strength<br>of<br>evidence | Main features                                                                                                                                                                        |
|--------------------------------|----------------------------|--------------------------------------------------------------------------------------------------------------------------------------------------------------------------------------|
| Marziali 2011<br>[51]          | High                       | Mixed methods comparison study, qualitative data achieved<br>VC meetings chat sessions and interviews, size satisfactory<br>(n=91), two independent coders, good integration of data |
| Nyström 2006<br>& 2008 [43,44] | High                       | Qualitative study, diary notes and interviews, researcher as<br>observer but not considered in findings                                                                              |
| Tsaousides<br>2014 [48]        | Low                        | Mixed methods cohort non-randomised prospective study,<br>no control group, small number (n=7), outcome data for<br>>80% of measures, bias sample                                    |
| Wild 2015 [56]                 | High                       | Quantitative randomised controlled study, satisfactory<br>numbers (n=117), clear randomisation                                                                                       |

#### References:

38. Khatri N, Marziali E, Tchernikov I, Shepherd N. Comparing telehealth-based and clinic-based group cognitive behavioral therapy for adults with depression and anxiety: a pilot study. *Clin Interv Aging*. 2014;9:765-70. doi: 10.2147/cia.s57832. PMID: 24855345.
41. Marziali E, Damianakis T, Donahue P. Internet-Based Clinical Services: Virtual Support Groups for Family Caregivers. *J Technol Hum Serv*. 2006b;24(2/3):39-54. doi: 10.1300/J017v24n0203. PMID: 23259160.
42. Marziali E, Donahue P. Caring for others: Internet video-conferencing group intervention for family caregivers of older adults with neurodegenerative disease. *Gerontologist*. 2006a;46(3):398-403. PMID: 16731880.
43. Nyström K, Öhrling K. Parental support: Mothers' experience of electronic encounters. *J Telemed Telecare*. 2006;12(4):194-7. PMID: 16774701.
44. Nyström K, Öhrling K. Electronic encounters: fathers' experiences of parental support. *J Telemed Telecare*. 2008;14(2):71-4. doi: 10.1258/jtt.2007.070605. PMID: 31214651.
45. Adamski T, Alfaro MW. Virtual psycho-educative support groups for caregivers of persons diagnosed with dementia. *Caring*. 2009;28(8):44-6. PMID: 19772023.
46. Austrom MG, Geros KN, Hemmerlein K, McGuire SM, Gao S, Brown SA, et al. Use of a multiparty web based videoconference support group for family caregivers: Innovative practice. *Dementia*. 2015;14(5):682-90. doi: 10.1177/1471301214544338. PMID: 2015-45450-009.
47. Ehlers DK, Huberty JL, de Vreede G-J. Can an Evidence-Based Book Club Intervention Delivered via a Tablet Computer Improve Physical Activity in Middle-Aged Women? *Telemed J E Health*. 2015;21(2):125-31. doi: 10.1089/tmj.2013.0360. PMID: 100749832.
48. Tsaousides T, D'Antonio E, Varbanova V, Spielman L. Delivering group treatment via videoconference to individuals with traumatic brain injury: a feasibility study. *Neuropsychol Rehabil*. 2014;24(5):784-803. doi: 10.1080/09602011.2014.907186. PMID: 24810148.

49. Damianakis T, Tough A, Marziali E, Dawson DR. Therapy Online: A Web-Based Video Support Group for Family Caregivers of Survivors With Traumatic Brain Injury. *J Head Trauma Rehabil.* 2016;31(4):E12-E20. PMID: 26291634.
50. Marziali E. E-health program for patients with chronic disease. *Telemed E Health.* 2009;15(2):176-81. PMID: 19292627.
51. Marziali E, Garcia LJ. Dementia caregivers' responses to 2 Internet-based intervention programs. *Am J Alzheimers Dis Other Demen.* 2011;26(1):36-43. doi: 10.1177/1533317510387586. PMID: 21282276.
53. Burkow TM, Vognild LK, Østengen G, Johnsen E, Risberg MJ, Bratvold A, et al. Internet-enabled pulmonary rehabilitation and diabetes education in group settings at home: a preliminary study of patient acceptability. *BMC Med Inform Decis Mak.* 2013;13(1):33. doi: 10.1186/1472-6947-13-33. PMID: 23496829.
54. Burkow TM, Vognild LK, Johnsen E, Risberg MJ, Bratvold A, Breivik E, et al. Comprehensive pulmonary rehabilitation in home-based online groups: a mixed method pilot study in COPD. *BMC Res Notes.* 2015;8(1):766. doi: 10.1186/s13104-015-1713-8. PMID: 26651831.
55. Banbury A, Parkinson L, Nancarrow S, Dart J, Gray L, Buckley J. Multi-site videoconferencing for home-based education of older people with chronic conditions: the Telehealth Literacy Project. *J Telemed Telecare.* 2014;20(7):353-9. doi: 10.1177/1357633X14552369. PMID: 99467458.
56. Wild B, Hunnemeyer K, Sauer H, Hain B, Mack I, Schellberg D, et al. A 1-year videoconferencing-based psychoeducational group intervention following bariatric surgery: results of a randomized controlled study. *Surg Obes Relat Dis.* 2015 Nov-Dec;11(6):1349-60. doi: 10.1016/j.soard.2015.05.018. PMID: 26421929.
