# Supplementary material for: Telehealth Interventions Delivering Home-based Support Group Videoconferencing: Systematic Review
Source: PubMed Central journal article supplement (PMC5816261; doi:10.2196/jmir.8090), 2018-02-02
Supplement: jmir_v20i2e25_app2.pdf [file jmir_v20i2e25_app2.pdf]

Multimedia Appendix 2. Intervention characteristics of included studies.

| Author, year, country | Description of intervention                                                                                                                     | Target group, mean age (years)                                                | Number of participants                       | Duration and frequency                                                                                                 | Total VC <sup>a</sup> group sessions |
|-----------------------|-------------------------------------------------------------------------------------------------------------------------------------------------|-------------------------------------------------------------------------------|----------------------------------------------|------------------------------------------------------------------------------------------------------------------------|--------------------------------------|
| Adamski, 2009 [45]    | Education and support group comparing VC group with face-to-face group                                                                          | Caregivers, 38                                                                | N=5—two groups, unknown number in each group | 5 x 1 hour, frequency unspecified                                                                                      | Unknown                              |
| Astrom, 2015 [46]     | Education (group identified needs), peer support, and guest speakers on specialized topics                                                      | Caregivers, 56.2                                                              | N=5                                          | 26 x 1 hour weekly                                                                                                     | 26                                   |
| Banbury, 2014 [55]    | Education on health literacy and chronic disease self-management peer support group                                                             | Persons with chronic disease, 73                                              | N=52—nine groups, comprised 2-7 participants | 6 x 45 min to 1 hour and 30 min weekly                                                                                 | 44                                   |
| Burkow, 2013 [53]     | Educational program; all participants required to watch tailored education videos before sessions, complete digital diary and weekly individual | Persons with chronic obstructive pulmonary disease (COPD) and diabetes, 45-74 | N=10—two groups each with 5 participants     | COPD group—eight twice-weekly group sessions for 30 min and six weekly individual consultations (duration unspecified) | 22                                   |

|                       |                                                                                                                                                                                           |                              |                                          |                                                                                                                         |    |
|-----------------------|-------------------------------------------------------------------------------------------------------------------------------------------------------------------------------------------|------------------------------|------------------------------------------|-------------------------------------------------------------------------------------------------------------------------|----|
|                       | consultations                                                                                                                                                                             |                              |                                          | Diabetic group—six weekly sessions and individual consultations (duration unspecified)                                  |    |
| Burkow, 2015 [54]     | Educational and group exercise sessions. Participants required to watch educational videos, complete digital diary, pedometer and individual consultations                                | Persons with COPD, 45 and 74 | N=10—two groups each with 5 participants | 9 x 2 hour weekly: 1 hour lecture and discussion group, 30 min exercise group, and up to 15 min individual consultation | 18 |
| Damianakis, 2016 [49] | Access to website with educational information, email, text-based discussion forum, and VC link. VC group was parental training program and forum to share feelings and gain peer support | Caregivers, 19.8             | N=10—two groups each with 5 participants | 10 x 1 hour weekly                                                                                                      | 20 |

|                      |                                                                                                                                                                                                                                |                                                                                         |                                                                                           |                    |         |
|----------------------|--------------------------------------------------------------------------------------------------------------------------------------------------------------------------------------------------------------------------------|-----------------------------------------------------------------------------------------|-------------------------------------------------------------------------------------------|--------------------|---------|
| Ehlers, 2015<br>[47] | Theory-based book club for education and peer support group comparing face-to-face and VC groups. VC group only had access to website and pedometer steps tracker                                                              | Women not reaching physical activity guidelines, 44.77 tablet group, 48.20 face-to-face | N=30—two groups, one face-to-face and one tablet, each with 15 participants               | 12 x 1 hour weekly | 12      |
| Khatri, 2014<br>[38] | Access through website with email, text-based discussion forum, VC link, and education information. Group cognitive behavior therapy focused on socialization, basic behavior interventions, and cognitive behavior strategies | Persons with chronic disease, 50.8 VC group and 58.4 face-to-face group                 | N=18—two groups, 10 participants in face-to-face group, and 8 participants chose VC group | 13 x 1 hour weekly | 13      |
| Lundberg, 2014 [52]  | Education and support group                                                                                                                                                                                                    | Caregivers, 80.2 caregivers and 72.5 care beneficiary                                   | N=10                                                                                      | Unknown            | Unknown |
| Marziali,            | Website with                                                                                                                                                                                                                   | Caregivers,                                                                             | N=66—two                                                                                  | 10 x 1 hour        | 22      |

|                         |                                                                                                                                      |                                    |                                                                                                                    |                                                                                                                                              |    |
|-------------------------|--------------------------------------------------------------------------------------------------------------------------------------|------------------------------------|--------------------------------------------------------------------------------------------------------------------|----------------------------------------------------------------------------------------------------------------------------------------------|----|
| 2006a and 2006b [42,41] | embedded link for VC groups, which delivered education, psychosocial support, and problem-solving skills                             | 67.8                               | groups, control (no intervention ) and intervention; and three disease-specific groups comprised 4 -6 participants | weekly health professional facilitated sessions followed by 12 x weekly group member facilitated sessions (duration unspecified)             |    |
| Marziali, 2009 [50]     | Website with email, information, text-based discussion forum, and embedded VC links. VC group for education and psychosocial support | Persons with chronic disease, 60.8 | N=18— three groups each with 6 participants                                                                        | 10 x 1 hour weekly health professional facilitated sessions followed by 12 x weekly group member facilitated sessions (duration unspecified) | 96 |
| Marziali, 2011 [51]     | Education and psychosocial support. Website with email, information, text-based discussion forum, educational                        | Caregivers, 65.1                   | N=9—two groups: text-based chat group comprised 40 participants, VC group comprised                                | 10 x 1 hour weekly followed by 10 x 1 hour weekly group member facilitated sessions (duration                                                | 20 |

|                                |                                                                                        |                                                            |                                                                                      |                                        |                   |
|--------------------------------|----------------------------------------------------------------------------------------|------------------------------------------------------------|--------------------------------------------------------------------------------------|----------------------------------------|-------------------|
|                                | videos, and embedded VC links                                                          |                                                            | 51, participants split into unspecified no. of subgroups each with 6 participants    | unspecified)                           |                   |
| Nyström, 2006 and 2008 [43,44] | Support group (group identified topics for discussion), problem solving                | New parents, 20-34                                         | N=9—two groups comprised mothers with 5 participants and fathers with 4 participants | 9 x 1-1.5 hours monthly                | 18                |
| Tsaousides, 2014 [48]          | Cognitive behavioral therapy for emotion regulation, education, and skill acquisition. | Persons with chronic disease, 42.8                         | N=7—two groups comprised 4 and 3 participants                                        | 16 x 1 hour twice weekly               | 16                |
| Wild, 2015 [56]                | Focus on education, skill acquisition, and social support.                             | Persons with obesity, usual care group 41.2, VC group 41.9 | N=117—two groups, usual care comprised 56 participants and VC group comprised 58     | 5 x 90 min face-to-face, 6 x 50 min VC | Approximately 116 |

|  |  |  |              |  |  |
|--|--|--|--------------|--|--|
|  |  |  | participants |  |  |
|--|--|--|--------------|--|--|

<sup>a</sup>VC: videoconferencing.

## References:

38. Khatri N, Marziali E, Tchernikov I, Shepherd N. Comparing telehealth-based and clinic-based group cognitive behavioral therapy for adults with depression and anxiety: a pilot study. *Clin Interv Aging*. 2014;9:765-70. doi: 10.2147/cia.s57832. PMID: 24855345.
41. Marziali E, Damianakis T, Donahue P. Internet-Based Clinical Services: Virtual Support Groups for Family Caregivers. *J Technol Hum Serv*. 2006b;24(2/3):39-54. doi: 10.1300/J017v24n0203. PMID: 23259160.
42. Marziali E, Donahue P. Caring for others: Internet video-conferencing group intervention for family caregivers of older adults with neurodegenerative disease. *Gerontologist*. 2006a;46(3):398-403. PMID: 16731880.
43. Nyström K, Öhrling K. Parental support: Mothers' experience of electronic encounters. *J Telemed Telecare*. 2006;12(4):194-7. PMID: 16774701.
44. Nyström K, Öhrling K. Electronic encounters: fathers' experiences of parental support. *J Telemed Telecare*. 2008;14(2):71-4. doi: 10.1258/jtt.2007.070605. PMID: 31214651.
45. Adamski T, Alfaro MW. Virtual psycho-educative support groups for caregivers of persons diagnosed with dementia. *Caring*. 2009;28(8):44-6. PMID: 19772023.
46. Austrom MG, Geros KN, Hemmerlein K, McGuire SM, Gao S, Brown SA, et al. Use of a multiparty web based videoconference support group for family caregivers: Innovative practice. *Dementia*. 2015;14(5):682-90. doi: 10.1177/1471301214544338. PMID: 2015-45450-009.
47. Ehlers DK, Huberty JL, de Vreede G-J. Can an Evidence-Based Book Club Intervention Delivered via a Tablet Computer Improve Physical Activity in Middle-Aged Women? *Telemed J E Health*. 2015;21(2):125-31. doi: 10.1089/tmj.2013.0360. PMID: 100749832.
48. Tsaousides T, D'Antonio E, Varbanova V, Spielman L. Delivering group treatment via videoconference to individuals with traumatic brain injury: a feasibility study. *Neuropsychol Rehabil*. 2014;24(5):784-803. doi: 10.1080/09602011.2014.907186. PMID: 24810148.
49. Damianakis T, Tough A, Marziali E, Dawson DR. Therapy Online: A Web-Based Video Support Group for Family Caregivers of Survivors With Traumatic Brain Injury. *J Head Trauma Rehabil*. 2016;31(4):E12-E20. PMID: 26291634.
50. Marziali E. E-health program for patients with chronic disease. *Telemed E Health*. 2009;15(2):176-81. PMID: 19292627.
51. Marziali E, Garcia LJ. Dementia caregivers' responses to 2 Internet-based intervention programs. *Am J Alzheimers Dis Other Demen*. 2011;26(1):36-43. doi: 10.1177/1533317510387586. PMID: 21282276.
52. Lundberg S. The results from a two-year case study of an information and communication technology support system for family caregivers. *Dis Rehab Ass Technol*. 2014 Jul;9(4):353-8. doi: 10.3109/17483107.2013.814170. PMID: 23855387.
53. Burkow TM, Vognild LK, Østengen G, Johnsen E, Risberg MJ, Bratvold A, et al. Internet-enabled pulmonary rehabilitation and diabetes education in group settings at home: a preliminary study of patient acceptability. *BMC Med Inform Decis Mak*. 2013;13(1):33. doi: 10.1186/1472-6947-13-33. PMID: 23496829.

54. Burkow TM, Vognild LK, Johnsen E, Risberg MJ, Bratvold A, Breivik E, et al. Comprehensive pulmonary rehabilitation in home-based online groups: a mixed method pilot study in COPD. *BMC Res Notes*. 2015;8(1):766. doi: 10.1186/s13104-015-1713-8. PMID: 26651831.
55. Banbury A, Parkinson L, Nancarrow S, Dart J, Gray L, Buckley J. Multi-site videoconferencing for home-based education of older people with chronic conditions: the Telehealth Literacy Project. *J Telemed Telecare*. 2014;20(7):353-9. doi: 10.1177/1357633X14552369. PMID: 99467458.
56. Wild B, Hunnemeyer K, Sauer H, Hain B, Mack I, Schellberg D, et al. A 1-year videoconferencing-based psychoeducational group intervention following bariatric surgery: results of a randomized controlled study. *Surg Obes Relat Dis*. 2015 Nov-Dec;11(6):1349-60. doi: 10.1016/j.soard.2015.05.018. PMID: 26421929.
